# Supplementary material for: Novel Flavivirus Attenuation Markers Identified in the Envelope Protein of Alfuy Virus
Source: MDPI journal article supplement (doi:10.3390/v13020147), 2021-01-20
Supplement: s1 [file s1]

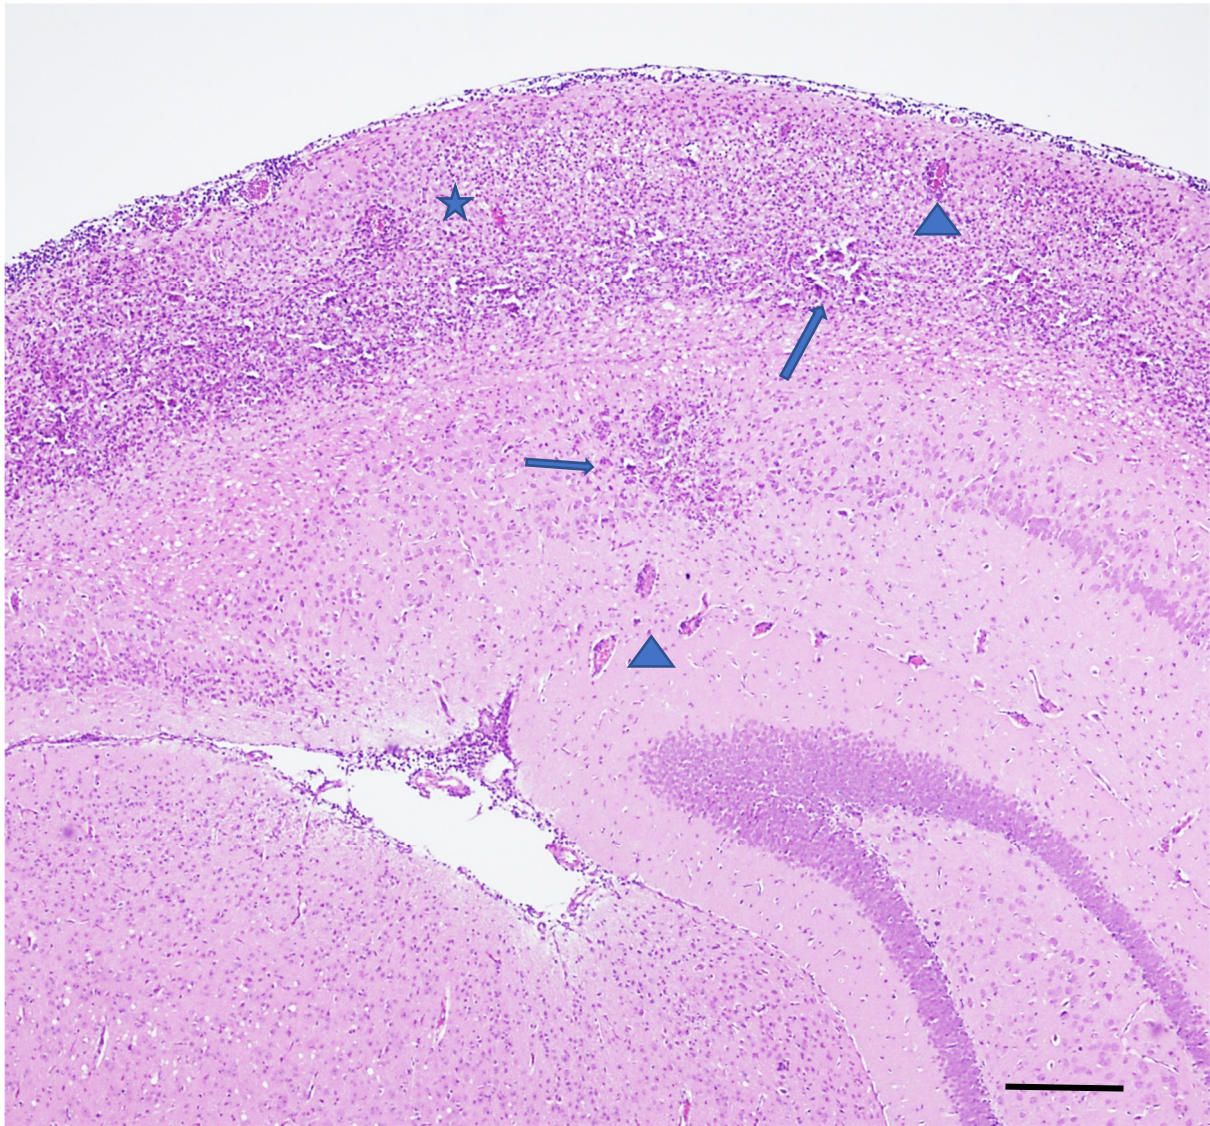

**Supplementary Figure 1.** Cerebral cortex of mouse infected with GAG-mutant. The outer neuronal layers are diffusely infiltrated with macrophages and lymphocytes (star), there is almost complete loss of neurons, vascular cuffing (arrow heads) and multifocal mineralization of the inflamed neuropil (arrows). H&E stained paraffin-embedded tissue section. Scale bar: 200  $\mu$
