# Supplementary material for: Novel Flavivirus Attenuation Markers Identified in the Envelope Protein of Alfuy Virus
Source: MDPI journal article supplement (doi:10.3390/v13020147), 2021-01-20
Supplement: s1 [file s1]

## Supplementary Material

**Table S1.** Primers used for mutagenesis and sequencing

| Oligo Name        | Type        | Sequence (5' - 3')                    | Gene |
|-------------------|-------------|---------------------------------------|------|
| MVE832s (Ff)      | Forward     | GGATTCCACCAAGGCCACTCG                 | C    |
| MVE4450 (Fr)      | Reverse     | CGCTGGTACCTGTTATTGCTGCC               | NS1  |
| ALF1450ΔGlyΔXmn1s | Mutagenesis | CCATGGAAACTA <b>T</b> TCCACCCAAGTAGG  | E    |
| ALF1476ΔGlyΔXmn1s | Mutagenesis | CCTACTTGGGTGGA <b>A</b> TAGTTTCCATGG  | E    |
| ALF1801ΔHinΔXho1s | Mutagenesis | AGTGCAG <b>TTCTCGAG</b> CAGCACATTGAAG | E    |
| ALF1835ΔHinΔXho1s | Mutagenesis | CTTCAATGTGCT <b>GCTCGAGA</b> ACTGCACT | E    |
| MVE908s           | Forward     | GCTGTAGCTCTAGGCTGGATGC                | C    |
| MVE4380           | Reverse     | GGCTTTTCCCGAGATAACATAGG               | NS1  |
| pALF3548F         | Sequencing  | GTCGCAGGAGGGAGCACTTCA                 | E    |
| ALFE17125         | Sequencing  | GCCACTAAGCAATCCGTGGTCGC               | E    |
| ALFE1549          | Sequencing  | TGGTTCGCATTCCACTGTCAC                 | E    |
| ALF327-GAG-F      | Mutagenesis | TAGTGTTAGAACTCAAGTATTTGGGAGC          | E    |
| ALF327-GAG-R      | Mutagenesis | TCCCAAATACTTGAGTTCTAACACTACC          | E    |
| pMVE/ALFE-F       | Mutagenesis | GATTAAGTTGGGTAACGCCAGG                | E    |
| pMVE/ALFE-R       | Mutagenesis | GAAGCACCTTCT <b>AG</b> GAAATCACG      | E    |

Nucleotides in Bold indicate MVEV sequence
